# Supplementary material
Source: publisher site journal article supplement (https://www.dovepress.com/article/540994)
Supplement: Supplementary file 1 [file 540994%20Supplementary%20Material.docx]

**Methods S.1** Latent class analysis for comorbidity clusters

Records of 27 selected comorbidity diagnoses in the 10 years before the surgery date, were obtained from the Danish National Patient Registry (1). Diagnoses with a prevalence >1% and known association with risk of infection were identified from comorbidity indices, including the Charlson, Elixhauser, Rx-risk, and Nordic Comorbidity Indices (2-6). We then used latent class analysis to classify patients into comorbidity phenotypes (clusters) that share characteristics based on the defined 27 comorbidities. The latent class analysis was chosen to overcome limitations of the more commonly used comorbidity indices. These limitations include a lack of important predictors of infection (e.g., the Charlson comorbidity index does not include depression or anxiety) (2). These indices rely on the calculation of summary scores based on weights by the comorbidities ability to predict mortality in other patient groups such as patients with breast cancer. Hence these scores are not ideal as predictors of infection in a hip fracture cohort. In latent class analysis, the resultant clusters represent homogeneous subgroups of the cohort that differ between each other. In latent class analysis the number of clusters (k) is predefined in the model, and we explored models containing between k = 2 and 10. We evaluated the fit for each model using several parameters (7-11). Optimal fit was considered in models with 1) the lowest Akaike information criterion (AIC) and Bayesian information criterion (BIC) values; 2) a considerable change in BIC for model k compared to model k-1; 3) the highest max log likelihood; 4) highest entropy and an entropy of at least 0.70; 5) smallest cluster size of at least >1% and preferable higher 6) average posterior probabilities for class membership markedly higher in the assigned cluster compared to the non-assigned clusters. The complexity, logical interpretation, and applicability of the resulting clusters for each model with k clusters was also considered in the choice of the final model. The optimal latent class model was evaluated to be the model with a cluster number of k=6. Patients were assigned by the highest probability of membership to one of the resulting six clusters. Each *comorbidity cluster* was labelled according to the distribution of prevalences of the comorbid diseases included in the model. In descending order of prevalence, the six identified comorbidity clusters were Healthy (54.9%), Cardiac-Pulmonary (13.3%), Cerebro-Vascular (13.1%), Hepatic-Psychological-Neurological (10.4%), Diabetic-Renal (4.5%), and Malignancy (3.9%). Results from the latent class analysis including values of model fit, average posterior probabilities of membership, and probabilities of the individual comorbid diseases are reported in Supplementary Tables S1, S2, and S3.

*References*

1. Schmidt M, Schmidt SA, Sandegaard JL, Ehrenstein V, Pedersen L, Sørensen HT. The Danish National Patient Registry: a review of content, data quality, and research potential. *Clin Epidemiol*. 2015;7:449-90. doi:10.2147/clep.S91125

2. Charlson ME, Pompei P, Ales KL, MacKenzie CR. A new method of classifying prognostic comorbidity in longitudinal studies: development and validation. *J Chronic Dis*. 1987;40(5):373-83. doi:10.1016/0021-9681(87)90171-8

3. Quan H, Sundararajan V, Halfon P, et al. Coding algorithms for defining comorbidities in ICD-9-CM and ICD-10 administrative data. *Med Care*. Nov 2005;43(11):1130-9. doi:10.1097/01.mlr.0000182534.19832.83

4. Elixhauser A, Steiner C, Harris DR, Coffey RM. Comorbidity measures for use with administrative data. *Med Care*. Jan 1998;36(1):8-27. doi:10.1097/00005650-199801000-00004

5. Pratt NL, Kerr M, Barratt JD, et al. The validity of the Rx-Risk Comorbidity Index using medicines mapped to the Anatomical Therapeutic Chemical (ATC) Classification System. *BMJ Open*. Apr 13 2018;8(4):e021122. doi:10.1136/bmjopen-2017-021122

6. Kristensen KB, Lund LC, Jensen PB, et al. Development and Validation of a Nordic Multimorbidity Index Based on Hospital Diagnoses and Filled Prescriptions. *Clin Epidemiol*. 2022;14:567-579. doi:10.2147/clep.S353398

7. Sinha P, Calfee CS, Delucchi KL. Practitioner's Guide to Latent Class Analysis: Methodological Considerations and Common Pitfalls. *Crit Care Med*. Jan 1 2021;49(1):e63-e79. doi:10.1097/ccm.0000000000004710

8. Muthén B, Muthén LK. Integrating person-centered and variable-centered analyses: growth mixture modeling with latent trajectory classes. *Alcohol Clin Exp Res*. Jun 2000;24(6):882-91.

9. Porcu M, Giambona F. Introduction to Latent Class Analysis With Applications. *The Journal of Early Adolescence*. 2017;37(1):129-158. doi:10.1177/0272431616648452

10. Lanza ST, Rhoades BL. Latent class analysis: an alternative perspective on subgroup analysis in prevention and treatment. *Prev Sci*. Apr 2013;14(2):157-68. doi:10.1007/s11121-011-0201-1

11. Linzer D, Lewis J. poLCA: Polytomous Variable Latent Class Analysis. 2023. <https://CRAN.R-project.org/package=poLCA>

**Table S.1** Measures of model fit in latent class analysis.

| **Number of classes in model** | **Number of para-meters** | **Degrees of freedom** | **Max log likelihood** | **Likelihood ratio** | **AIC** | **BIC** | **BIC decrease (%)** | **Smallest class size (%)** | **Entropy** |
| --- | --- | --- | --- | --- | --- | --- | --- | --- | --- |
| **2** | 55 | 54798 | -379948 | 86790 | 760006 | 760496 | - | 40.7 | 0.802 |
| **3** | 83 | 54770 | -376617 | 80128 | 753399 | 754139 | 6357 (8.4) | 6.6 | 0.844 |
| **4** | 111 | 54742 | -374569 | 76033 | 749361 | 750350 | 3789 (5.0) | 5.4 | 0.806 |
| **5** | 139 | 54714 | -373156 | 73208 | 746591 | 747830 | 2520 (3.4) | 5.0 | 0.803 |
| **6** | 167 | 54686 | -371933 | 70760 | 744199 | 745688 | 2142 (2.9) | 4.5 | 0.816 |
| **7** | 195 | 54658 | -371061 | 69017 | 742513 | 744250 | 1437 (1.9) | 4.5 | 0.796 |
| **8** | 223 | 54630 | -370334 | 67564 | 741115 | 743102 | 1148 (1.5) | 1.8 | 0.806 |
| **9** | 251 | 54602 | -370057 | 67009 | 740616 | 742853 | 249 (0.3) | 1.8 | 0.812 |
| **10** | 279 | 54574 | -369677 | 66249 | 739913 | 742399 | 454 (0.6) | 1.9 | 0.798 |

**Table S.2** Average posterior probability for cluster membership.

|  | | **Assigned cluster membership** | | | | | |
| --- | --- | --- | --- | --- | --- | --- | --- |
| **A** | **B** | **C** | **D** | **E** | **F** |
| **Possible cluster membership** | **A** | 85.8 | 7.7 | 4.3 | 0.8 | 9.5 | 10.2 |
| **B** | 5.3 | 66.9 | 8 | 2.9 | 11.6 | 7.3 |
| **C** | 2.2 | 12 | 76.6 | 3.2 | 8.7 | 7.7 |
| **D** | 0.1 | 2.4 | 2 | 91.4 | 0.9 | 1.1 |
| **E** | 4.5 | 9.4 | 7 | 1.3 | 66.9 | 8.1 |
| **F** | 2.2 | 1.5 | 2 | 0.4 | 2.3 | 65.7 |

A = Healthy; B = Cardiac-Pulmonary; C = Cerebro-Vascular; D = Liver-Psychological-Neurological; E = Diabetic-Renal; F = Malignancy

**Table S.3** Cluster-conditional probabilities of individual comorbid diseases.

| **Comorbid diseases** | **Healthy** | **Cardiac-Pulmonary** | **Cerebro-Vascular** | **Hepatic-Psychological-Neurological** | **Diabetic-Renal** | **Malignancy** |
| --- | --- | --- | --- | --- | --- | --- |
| Cerebrovascular disease | 4.7 | 24.6 | 50.6 | 27.1 | 32.5 | 11.9 |
| Heart arrhythmia | 6.6 | 59.9 | 24.4 | 15.8 | 33.9 | 15.1 |
| Heart failure | 1.1 | 46.3 | 0.7 | 3.4 | 23.6 | 1.9 |
| Hypertension | 9.5 | 60.6 | 73.8 | 41.7 | 75.1 | 39.5 |
| Hypotension | 0.2 | 5.4 | 2.4 | 7.0 | 5.2 | 1.6 |
| Myocardial infarction | 1.1 | 20.2 | 6.0 | 1.7 | 13.3 | 1.6 |
| Peripheral vascular disease | 3.9 | 18.2 | 11.0 | 7.7 | 23.4 | 7.5 |
| Valvular heart disease | 1.5 | 23.3 | 6.5 | 3.2 | 10.3 | 3.9 |
| Liver disease | 0.3 | 0.9 | 0 | 7.8 | 4.0 | 1.2 |
| Peptic ulcer | 1.8 | 9.5 | 3.2 | 13.1 | 10.2 | 5.2 |
| Any solid tumour | 9.9 | 18.7 | 12.0 | 13.5 | 18.3 | 94.2 |
| Hematologic cancer | 1.1 | 2.3 | 0.8 | 2.0 | 1.5 | 5.4 |
| Metastatic solid tumour | 0.1 | 0.7 | 0 | 0.2 | 1.3 | 31.8 |
| Diabetes, complicated | 0.6 | 1.6 | 2.5 | 0.6 | 82.4 | 1.2 |
| Diabetes, uncomplicated | 2.3 | 6.9 | 10.7 | 6.0 | 94.5 | 9.1 |
| Hypercholesterolemia | 0 | 17.2 | 31.2 | 4.6 | 31.3 | 5.0 |
| Thyroid disease | 2.2 | 9.5 | 6.9 | 8.5 | 10.9 | 5.8 |
| Rheumatic disease | 3.7 | 8.5 | 3.7 | 6.9 | 7.8 | 4.7 |
| Alcohol overuse | 1.4 | 2.3 | 1.5 | 18.7 | 7.0 | 3.4 |
| Dementia | 5.5 | 8.4 | 13.7 | 27.6 | 12.0 | 4.1 |
| Depression/anxiety | 0.8 | 7.1 | 8.4 | 22.9 | 8.8 | 5.8 |
| Neurological disorders | 3.5 | 4.9 | 8.7 | 14.5 | 8.0 | 4.5 |
| Chronic pulmonary disease | 6.7 | 28.9 | 10.6 | 20.5 | 20.6 | 16.2 |
| Pulmonary circulation disorders | 0.8 | 7.5 | 1.1 | 3.1 | 3.6 | 4.1 |
| Anaemia | 3.0 | 25.6 | 6.8 | 28.1 | 26.4 | 21.1 |
| Fluid and electrolyte disorders | 3.3 | 24.0 | 13.1 | 43.0 | 28.5 | 15.0 |
| Renal disease | 0.7 | 14.4 | 2.9 | 6.2 | 21.0 | 5.2 |

**Figure S.1** Directed acyclic graphs (DAGs) used for confounder identification. The DAG have been divided into two separate illustrations to ensure clearer interpretations. A) The overall DAG with SEP being simplified and including most important confounders. B) The part of the DAG considering the individual SEP markers

**
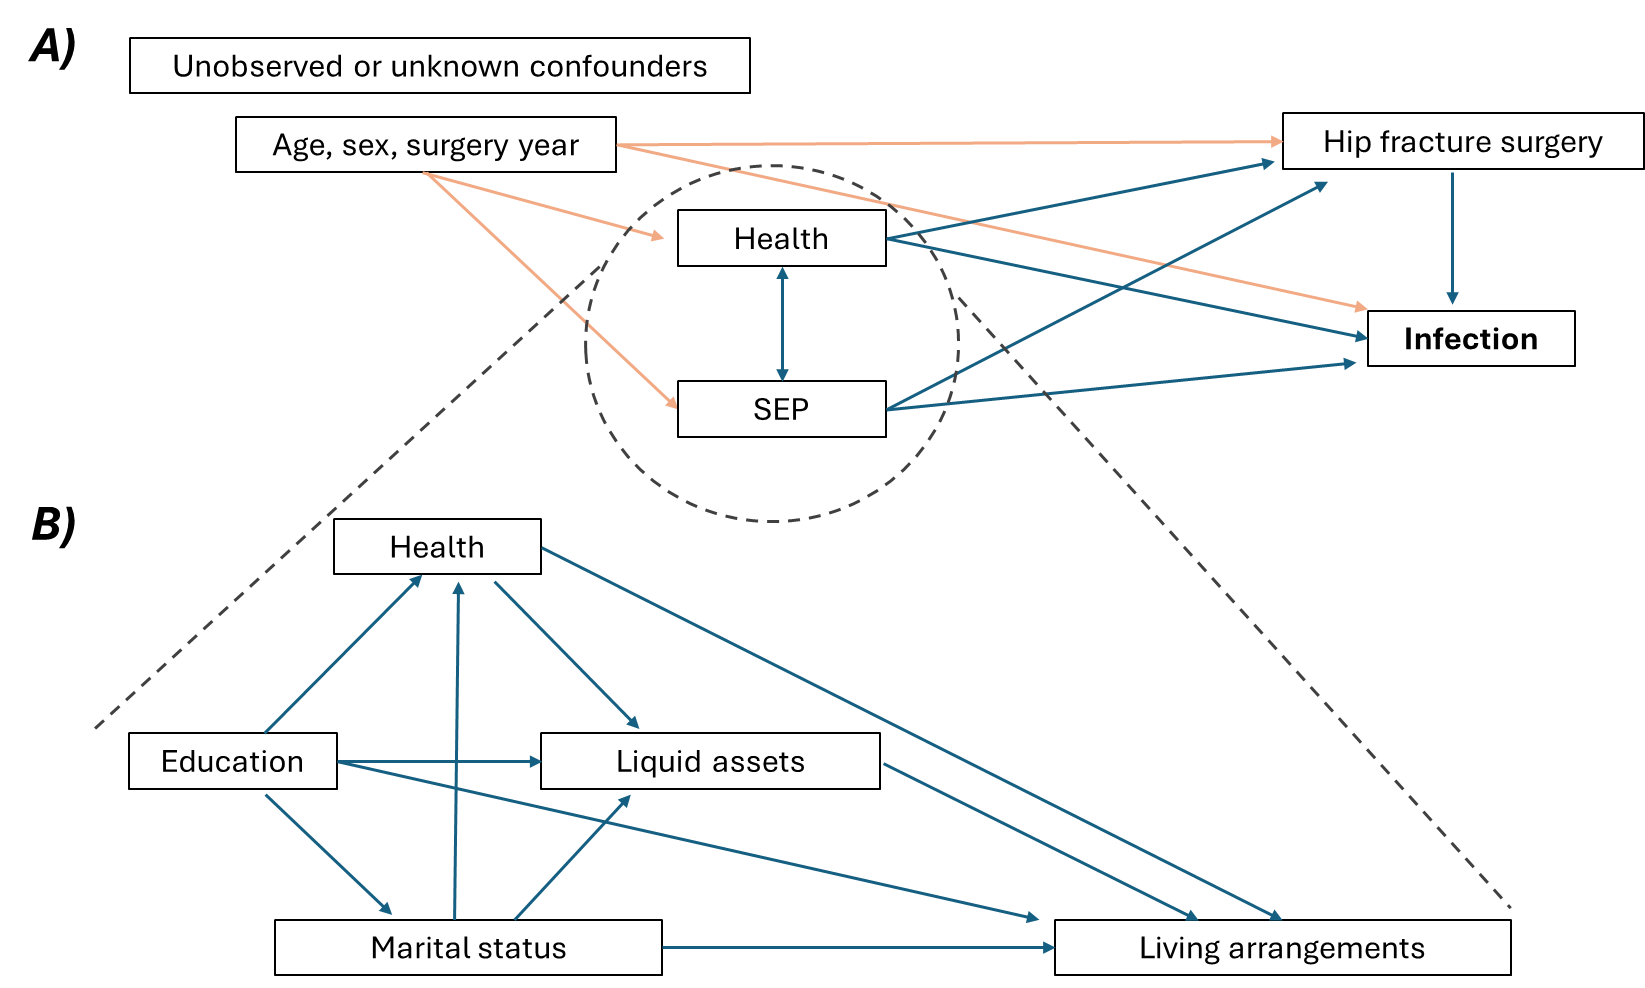
**

**Table S.4** Results for hospital-treated infection in the first 30 days following hip fracture surgery.

|  | **Number at risk** | **Number with infection** | **Cumulative incidence**  **(95% CI)** | **Crude HR**  **(95% CI)** | **Adjusted HR***  **(95% CI)** |
| --- | --- | --- | --- | --- | --- |
| Total | 54,853 | 9295 | 16.9 (16.6-17.3) | NA | NA |
|  |  |  |  |  |  |
| **Highest attained educational level** | | | | | |
| High | 5,749 | 892 | 15.5 (14.6-16.5) | Ref | Ref |
| Medium | 15,584 | 2,591 | 16.6 (16.0-17.2) | 1.08 (1.00-1.16) | 1.08 (1.00-1.16) |
| Low | 27,660 | 4,681 | 16.9 (16.5-17.4) | 1.11 (1.03-1.19) | 1.10 (1.02-1.18) |
|  |  |  |  |  |  |
| **Liquid assets** | | | | | |
| High | 18,282 | 2,884 | 15.8 (15.3-16.3) | Ref | Ref |
| Medium | 18,283 | 2,920 | 16.0 (15.4-16.5) | 1.03 (0.98-1.08) | 0.99 (0.93-1.04) |
| Low | 18,288 | 3,491 | 19.1 (18.5-19.7) | 1.25 (1.19-1.31) | 1.21 (1.15-1.28) |
|  |  |  |  |  |  |
| **Marital status** | | | | | |
| Married | 17,853 | 2,791 | 15.6 (15.1-16.2) | Ref | Ref |
| Divorced | 6,689 | 1,204 | 18.0 (17.1-18.9) | 1.17 (1.09-1.25) | 1.24 (1.15-1.32) |
| Never married | 3,447 | 588 | 17.1 (15.8-18.3) | 1.10 (1.01-1.21) | 1.09 (1.00-1.19) |
| Widowed | 26,864 | 4,712 | 17.5 (17.1-18.0) | 1.16 (1.10-1.21) | 1.07 (1.01-1.13) |
|  |  |  |  |  |  |
| **Living arrangement** | | | | | |
| Cohabiting | 13,593 | 2,001 | 14.7 (14.1-15.3) | Ref | Ref |
| Alone | 21,619 | 3,806 | 17.6 (17.1-18.1) | 1.23 (1.16-1.29) | 1.18 (1.06-1.30) |
| Nursing home | 11,928 | 2,122 | 17.8 (17.1-18.5) | 1.29 (1.21-1.37) | 1.16 (1.05-1.28) |

Abbreviations: 95% confidence interval (95% CI); Hazard ratio (HR)

* Education adjusted by age, sex, and surgery year. Liquid assets adjusted by age, sex, surgery year, education, marital status, and comorbidity cluster. Marital status adjusted by age, sex, surgery year, and education. Living arrangements adjusted by age, sex, surgery year, education, marital status, comorbidity cluster, liquid assets, body mass index, and pre-fracture mobility.

**Table S.5** Results for community-treated infection in the 30 days after hip fracture surgery.

|  | **Number at risk** | **Number with infection** | **Cumulative incidence**  **(95% CI)** | **Crude HR**  **(95% CI)** | **Adjusted HR***  **(95% CI)** |
| --- | --- | --- | --- | --- | --- |
| Total | 54,853 | 14,888 | 27.1 (26.8-27.5) | NA | NA |
|  |  |  |  |  |  |
| **Education** | | | | | |
| High | 5,749 | 1,401 | 24.4 (23.3-25.5) | Ref | Ref |
| Medium | 15,584 | 3,995 | 25.6 (25.0-26.3) | 1.07 (1.00-1.13) | 1.08 (1.01-1.14) |
| Low | 27,660 | 7,658 | 27.7 (27.2-28.2) | 1.18 (1.12-1.25) | 1.12 (1.05-1.18) |
|  |  |  |  |  |  |
| **Liquid assets** | | | | | |
| High | 18,282 | 4,530 | 24.8 (24.2-25.4) | Ref | Ref |
| Medium | 18,283 | 5,076 | 27.8 (27.1-28.4) | 1.17 (1.12-1.22) | 1.09 (1.04-1.13) |
| Low | 18,288 | 5,282 | 28.9 (28.2-29.5) | 1.22 (1.18-1.27) | 1.16 (1.11-1.21) |
|  |  |  |  |  |  |
| **Marital status** | | | | | |
| Married | 17,853 | 4,296 | 24.1 (23.4-24.7) | Ref | Ref |
| Divorced | 6,689 | 1,706 | 25.5 (24.5-26.6) | 1.06 (1.00-1.12) | 1.06 (1.00-1.12) |
| Never married | 3,447 | 889 | 25.8 (24.3-27.3) | 1.09 (1.01-1.17) | 1.05 (0.97-1.13) |
| Widowed | 26,864 | 7,997 | 29.8 (29.2-30.3) | 1.32 (1.27-1.37) | 1.09 (1.04-1.13) |
|  |  |  |  |  |  |
|  |  |  |  |  |  |
| **Living arrangement** | | | | | |
| Cohabiting | 13,593 | 3,139 | 23.1 (22.4-23.8) | Ref | Ref |
| Alone | 21,619 | 5610 | 25.9 (25.4-26.5) | 1.15 (1.10-1.20) | 1.01 (0.94-1.09) |
| Nursing home | 11,928 | 4347 | 36.4 (35.6-37.3) | 1.96 (1.87-2.05) | 1.63 (1.52-1.75) |

Abbreviations: 95% confidence interval (95% CI); Hazard ratio (HR)

*Education adjusted by age, sex, and surgery year. Liquid assets adjusted by age, sex, surgery year, education, marital status, and comorbidity cluster. Marital status adjusted by age, sex, surgery year, and education. Living arrangements adjusted by age, sex, surgery year, education, marital status, comorbidity cluster, liquid assets, body mass index, and pre-fracture mobility.

**Table S.6** 30-day cumulative incidence with 95% confidence interval of hospital-treated infection after hip fracture surgery, stratified by comorbidity cluster.

|  | **Comorbidity clusters** | | | | | |
| --- | --- | --- | --- | --- | --- | --- |
|  | **Healthy** | **Cardiac-Pulmonary** | **Cerebro-Vascular** | **Hepatic-Psychological-Neurological** | **Diabetic-Renal** | **Malignancy** |
|  |  |  |  |  |  |  |
| **Total** | 14.1 (13.7-14.5) | 21.8 (20.9-22.8) | 18.3 (17.4-19.2) | 20.7 (19.6-21.7) | 23.5 (21.9-25.2) | 17.9 (16.3-19.6) |
|  |  |  |  |  |  |  |
| **Education** | | | | | | |
| High | 12.1 (11.0-13.3) | 24.3 (21.1-27.6) | 17.3 (14.6-20.1) | 20.6 (17.3-24.1) | 21.1 (15.9-26.8) | 17.2 (12.7-22.2) |
| Medium | 13.6 (12.9-14.3) | 21.9 (20.1-23.8) | 18.1 (16.5-19.8) | 20.6 (18.7-22.6) | 24.3 (21.3-27.3) | 16.7 (14.0-19.6) |
| Low | 14.1 (13.6-14.7) | 21.4 (20.1-22.7) | 18.2 (16.9-19.4) | 20.7 (19.2-22.2) | 23.3 (21.1-25.6) | 17.5 (15.3-19.9) |
|  |  |  |  |  |  |  |
| **Liquid assets** | | | | | | |
| High | 13.0 (12.4-13.7) | 21.4 (19.7-23.2) | 17.6 (16.1-19.1) | 20.5 (18.5-22.6) | 23.6 (20.4-26.9) | 17.8 (15.2-20.6) |
| Medium | 13.6 (12.9-14.3) | 20.3 (18.8-21.9) | 16.8 (15.3-18.3) | 20.2 (18.4-22.1) | 22.6 (19.6-25.7) | 14.7 (12.2-17.4) |
| Low | 16.1 (15.4-16.9) | 23.6 (22.0-25.2) | 20.4 (18.8-22.1) | 21.1 (19.5-22.8) | 24.1 (21.6-26.6) | 21.5 (18.4-24.7) |
|  |  |  |  |  |  |  |
| **Marital status** | | | | | | |
| Married | 12.0 (11.4-12.7) | 22.1 (20.4-23.8) | 16.7 (15.2-18.2) | 22.6 (20.5-24.8) | 23.9 (21.2-26.7) | 17.6 (15.1-20.2) |
| Divorced | 14.6 (13.4-15.8) | 22.5 (19.7-25.5) | 19.6 (17.1-22.3) | 22.0 (19.5-24.7) | 24.5 (20.5-28.7) | 18.2 (13.7-23.1) |
| Never married | 15.7 (14.2-17.3) | 20.1 (16.1-24.4) | 17.0 (13.4-20.9) | 17.8 (14.3-21.7) | 25.2 (18.6-32.2) | 17.9 (11.6-25.4) |
| Widowed | 15.2 (14.7-15.8) | 21.7 (20.4-23.0) | 19.2 (17.9-20.5) | 19.7 (18.3-21.1) | 22.6 (20.1-25.2) | 18.2 (15.7-20.8) |
|  |  |  |  |  |  |  |
| **Living arrangement** | | | | | | |
| Cohabiting | 11.2 (10.6-12.0) | 21.2 (19.3-23.2) | 15.8 (14.2-17.5) | 22.4 (19.7-25.2) | 23.1 (20.0-26.2) | 17.2 (14.4-20.2) |
| Alone | 15.4 (14.8-16.0) | 22.1 (20.6-23.6) | 18.9 (17.5-20.5) | 21.1 (19.3-23.0) | 22.8 (20.0-25.7) | 17.5 (15.0-20.2) |
| Nursing home | 14.9 (14.0-15.8) | 21.6 (19.6-23.6) | 19.1 (17.2-21.0) | 19.4 (17.8-21.2) | 24.5 (21.1-28.1) | 18.6 (14.6-23.1) |
|  |  |  |  |  |  |  |

**Table S.7** 30-day cumulative incidence with 95% confidence interval of hospital-treated infection after hip fracture surgery, stratified by body mass index, pre-fracture mobility, and residence.

|  | **Body mass index** | | | **Pre-fracture mobility** | | **Residence type** | |
| --- | --- | --- | --- | --- | --- | --- | --- |
|  | **Underweight** | **Normal** | **Overweight** | **Poor** | **Good** | **Own home** | **Nursing home** |
|  |  |  |  |  |  |  |  |
| **Total** | 17.9 (17.0-18.8) | 16.4 (15.9-16.9) | 16.7 (16.1-17.3) | 21.5 (20.4-22.7) | 16.1 (15.7-16.5) | 16.5 (16.1-16.9) | 17.8 (17.1-18.5) |
|  |  |  |  |  |  |  |  |
| **Education** | | | |  | | | |
| High | 14.9 (12.5-17.5) | 15.3 (13.9-16.8) | 15.1 (13.3-17.0) | 24.9 (20.9-29.0) | 14.3 (13.3-15.4) | 14.4 (13.3-15.5) | 18.7 (16.2-21.4) |
| Medium | 18.6 (16.9-20.4) | 16.4 (15.4-17.3) | 15.7 (14.6-16.8) | 21.7 (19.5-24.0) | 16.0 (15.3-16.7) | 16.0 (15.3-16.7) | 18.8 (17.3-20.3) |
| Low | 17.8 (16.6-19.1) | 16.0 (15.4-16.7) | 16.8 (16.0-17.6) | 20.2 (18.6-21.8) | 16.1 (15.6-16.7) | 16.5 (16.0-17.1) | 17.4 (16.5-18.3) |
|  |  |  |  |  |  |  |  |
| **Liquid assets** | | | |  | | | |
| High | 16.4 (14.9-17.9) | 15.8 (15.0-16.6) | 15.6 (14.6-16.7) | 23.2 (21.0-25.4) | 15.0 (14.4-15.6) | 15.1 (14.5-15.7) | 18.6 (17.1-20.2) |
| Medium | 15.9 (14.5-17.4) | 15.4 (14.6-16.2) | 14.9 (13.9-15.9) | 19.4 (17.5-21.3) | 15.1 (14.5-15.7) | 15.5 (14.8-16.2) | 16.5 (15.4-17.6) |
| Low | 21.4 (19.8-23.1) | 18.1 (17.2-19.0) | 19.5 (18.4-20.5) | 22.2 (20.3-24.2) | 18.4 (17.7-19.0) | 19.3 (18.5-20.0) | 18.5 (17.5-19.6) |
|  |  |  |  |  |  |  |  |
| **Marital status** | | | |  | | | |
| Married | 17.4 (15.8-19.1) | 15.5 (14.7-16.4) | 14.2 (13.3-15.1) | 23.8 (21.6-26.0) | 14.4 (13.8-15.0) | 14.7 (14.1-15.3) | 20.0 (18.3-21.7) |
| Divorced | 20.8 (18.2-23.4) | 17.2 (15.7-18.7) | 18.9 (17.2-20.8) | 23.1 (19.8-26.5) | 17.5 (16.5-18.6) | 18.0 (16.9-19.2) | 18.0 (16.0-20.0) |
| Never married | 18.0 (14.8-21.6) | 15.3 (13.4-17.2) | 18.2 (15.8-20.8) | 18.8 (14.6-23.3) | 15.8 (14.4-17.3) | 16.4 (14.8-18.0) | 18.1 (15.6-20.6) |
| Widowed | 17.4 (16.2-18.7) | 16.9 (16.2-17.6) | 18.0 (17.1-18.9) | 20.2 (18.6-21.8) | 16.9 (16.4-17.5) | 17.6 (17.0-18.2) | 17.1 (16.2-18.0) |
|  |  |  |  |  |  |  |  |
| **Living arrangement** | | | |  | | | |
| Cohabiting | 16.7 (14.9-18.6) | 14.6 (13.7-15.5) | 14.2 (13.3-15.2) | 24.2 (21.3-27.2) | 13.8 (13.1-14.4) | 14.7 (14.1-15.3) | NA |
| Alone | 18.6 (17.3-19.9) | 16.9 (16.1-17.6) | 18.1 (17.1-19.0) | 26.0 (23.5-28.5) | 16.7 (16.1-17.2) | 17.6 (17.1-18.1) | NA |
| Nursing home | 18.7 (16.8-20.6) | 17.8 (16.7-18.8) | 18.2 (16.9-19.6) | 18.7 (17.1-20.2) | 18.2 (17.3-19.1) | NA | 17.8 (17.1-18.5) |
|  |  |  |  |  |  |  |  |

**Table S.8** Adjusted hazard ratios with 95% confidence interval for hospital-treated infection in the first 30 days after hip fracture surgery, stratified by comorbidity cluster.

|  | **Comorbidity clusters** | | | | | |
| --- | --- | --- | --- | --- | --- | --- |
|  | **Healthy** | **Cardiac-Pulmonary** | **Cerebro-Vascular** | **Hepatic-Psychological-Neurological** | **Diabetic-Renal** | **Malignancy** |
|  |  |  |  |  |  |  |
| **Education** | | | | | | |
| High | ref | ref | ref | ref | ref | ref |
| Medium | 1.12 (1.00-1.26) | 0.88 (0.73-1.06) | 1.07 (0.88-1.31) | 1.00 (0.81-1.24) | 1.15 (0.83-1.60) | 0.97 (0.68-1.39) |
| Low | 1.13 (1.02-1.26) | 0.91 (0.76-1.08) | 1.08 (0.89-1.31) | 1.01 (0.83-1.24) | 1.17 (0.86-1.60) | 1.03 (0.73-1.44) |
|  |  |  |  |  |  |  |
| **Liquid assets** | | | | | | |
| High | Ref | ref | ref | ref | ref | ref |
| Medium | 0.97 (0.90-1.05) | 0.99 (0.87-1.13) | 0.93 (0.80-1.07) | 1.02 (0.87-1.19) | 0.96 (0.77-1.20) | 0.83 (0.64-1.08) |
| Low | 1.17 (1.08-1.27) | 1.20 (1.05-1.37) | 1.16 (1.00-1.33) | 1.08 (0.92-1.25) | 1.08 (0.87-1.34) | 1.27 (0.98-1.64) |
|  |  |  |  |  |  |  |
| **Marital status** | | | | | | |
| Married | ref | ref | ref | ref | ref | ref |
| Divorced | 1.29 (1.16-1.43) | 1.10 (0.92-1.30) | 1.26 (1.06-1.52) | 0.99 (0.83-1.18) | 1.07 (0.85-1.36) | 1.09 (0.78-1.52) |
| Never married | 1.27 (1.13-1.44) | 0.92 (0.72-1.18) | 1.04 (0.80-1.35) | 0.77 (0.60-1.00) | 1.10 (0.78-1.55) | 0.98 (0.62-1.55) |
| Widowed | 1.13 (1.04-1.22) | 0.99 (0.87-1.12) | 1.13 (0.99-1.30) | 0.82 (0.70-0.95) | 1.02 (0.83-1.25) | 0.95 (0.74-1.22) |
|  |  |  |  |  |  |  |
| **Living arrangement** | | | | | | |
| Cohabiting | ref | ref | ref | ref | ref | ref |
| Alone | 1.32 (1.14-1.52) | 1.14 (0.91-1.44) | 1.05 (0.82-1.34) | 1.00 (0.78-1.29) | 1.02 (0.73-1.44) | 1.16 (0.74-1.29) |
| Nursing home | 1.14 (0.99-1.31) | 1.10 (0.88-1.36) | 1.04 (0.82-1.30) | 0.88 (0.70-1.12) | 1.11 (0.81-1.53) | 1.13 (0.72-1.75) |
|  |  |  |  |  |  |  |

Education adjusted by age, sex, and surgery year. Liquid assets adjusted by age, sex, surgery year, education, marital status, and comorbidity cluster. Marital status adjusted by age, sex, surgery year, and education. Living arrangements adjusted by age, sex, surgery year, education, marital status, comorbidity cluster, liquid assets, body mass index, and pre-fracture mobility.

**Table S.9** Adjusted hazard ratios with 95% confidence interval for hospital-treated infection in the first 30 days after hip fracture surgery, stratified by body mass index, pre-fracture mobility, and residence.

|  | **Body mass index** | | | **Pre-fracture mobility** | | **Residence type** | |
| --- | --- | --- | --- | --- | --- | --- | --- |
|  | **Underweight** | **Normal** | **Overweight** | **Poor** | **Good** | **Own home** | **Nursing home** |
|  |  |  |  |  |  |  |  |
| **Education** | | | |  | | | |
| High | ref | ref | ref | ref | ref | ref | ref |
| Medium | 1.27 (1.03-1.57) | 1.08 (0.96-1.22) | 1.02 (0.88-1.19) | 0.85 (0.68-1.06) | 1.12 (1.02-1.23) | 1.12 (1.02-1.23) | 0.99 (0.83-1.17) |
| Low | 1.26 (1.03-1.54) | 1.07 (0.95-1.20) | 1.10 (0.95-1.27) | 0.81 (0.66-1.00) | 1.13 (1.04-1.24) | 1.14 (1.05-1.25) | 0.97 (0.82-1.14) |
|  |  |  |  |  |  |  |  |
| **Liquid assets** | | | |  | | | |
| High | ref | ref | ref | ref | ref | ref | ref |
| Medium | 0.97 (0.84-1.12) | 0.95 (0.87-1.03) | 0.89 (0.81-0.99) | 0.87 (0.74-1.02) | 0.96 (0.90-1.03) | 0.98 (0.92-1.05) | 0.92 (0.82-1.04) |
| Low | 1.34 (1.16-1.55) | 1.16 (1.06-1.26) | 1.16 (1.05-1.29) | 1.04 (0.88-1.22) | 1.19 (1.11-1.28) | 1.25 (1.17-1.34) | 1.07 (0.95-1.21) |
|  |  |  |  |  |  |  |  |
| **Marital status** | | | |  | | | |
| Married | ref | ref | ref | ref | ref | ref | ref |
| Divorced | 1.24 (1.04-1.47) | 1.19 (1.06-1.33) | 1.45 (1.28-1.65) | 1.04 (0.85-1.27) | 1.31 (1.21-1.42) | 1.33 (1.22-1.44) | 0.93 (0.80-1.09) |
| Never married | 1.03 (0.82-1.31) | 0.97 (0.84-1.13) | 1.28 (1.08-1.52) | 0.79 (0.60-1.05) | 1.10 (0.99-1.23) | 1.11 (0.99-1.24) | 0.90 (0.75-1.09) |
| Widowed | 0.95 (0.82-1.09) | 1.03 (0.95-1.13) | 1.20 (1.08-1.32) | 0.88 (0.75-1.03) | 1.10 (1.03-1.18) | 1.09 (1.02-1.17) | 1.07 (0.95-1.21) |
|  |  |  |  |  |  |  |  |
| **Living arrangement** | | | |  | | | |
| Cohabiting | ref | ref | ref | ref | ref | NA | NA |
| Alone | 1.25 (0.97-1.61) | 1.22 (1.06-1.41) | 1.08 (0.91-1.27) | 1.25 (0.98-1.61) | 1.13 (1.02-1.25) | NA | NA |
| Nursing home | 1.22 (0.95-1.55) | 1.21 (1.05-1.38) | 1.02 (0.86-1.20) | 0.85 (0.68-1.05) | 1.19 (1.07-1.32) | NA | NA |
|  |  |  |  |  |  |  |  |

Education adjusted by age, sex, and surgery year. Liquid assets adjusted by age, sex, surgery year, education, marital status, and comorbidity cluster. Marital status adjusted by age, sex, surgery year, and education. Living arrangements adjusted by age, sex, surgery year, education, marital status, comorbidity cluster, liquid assets, body mass index, and pre-fracture mobility.

**Table A.1** International Classification of Disease 10th Edition (ICD-10) codes used for defining comorbid diseases in the study.

| **COMORBIDITIES** | **EXAMPLES AND ELABORATION ON COMORBIDITIES** | **ICD-10 CODES** |
| --- | --- | --- |
| **CARDIOVASCULAR:** |  |  |
| **Cerebrovascular disease** | Ischemia and haemorrhagic stroke; Transient ischemic attack; Etc. | I60-I69; G45-G46 |
| **Heart arrhythmia** | Atrioventricular block; Paroxysmal tachycardia; Atrial fibrilation and flutter; Etc. | I44.1 - I44.3; I45.6; I45.9; I47-I49; R00.0; R00.1; R00.8; T82.1; Z45.0; Z95.0 |
| **Heart failure** | Hypertensive heart disease; Ischemic cardiomyopathy; Myocarditis; Chronic ishemic heart disease; Heart failure; Etc. | I11.0; I13.0; I13.2; I09.9; I25.5; I42.0; I42.5 - I43; I50; P29.0 |
| **Hypertension** | Essential hypertension; Hypertensive heart disease or kidney disease; Secondaye hypertension; Etc. | I10-I13; I15 |
| **Hypotension** | Orthostatic hypotension; Etc. | I95; G90.9A |
| **Myocardial infarction** | Acute myocardial infarction; Complications to acute myocardial infarction; Etc. | I21-I23 |
| **Peripheral vascular disease** | Atherosclerosis; Arotic or peropheral anoeurysm and dissection; Arterial embolism and thromobosis; Claudicatio; Etc. | I70-I74; I77 |
| **Valvular heart disease** | Mitral and aortic valve disease; Etc. | A52.0; I05-I08; I09.1; I09.8; I34-I39; Q23.0-Q23.3; Z95.2-Z95.4 |
| **HEPATIC/GASTROINTESTINAL:** |  |  |
| **Liver disease** | Hepatitis; Esophegael varices; Alcoholic liver disease; Toxic liver diesase; Hepatic failure; Liver cirrhosis; Etc. | B15.0; B16.0; B16.2; B18; B19.0; I85; K70.0-K70.4; K70.9; K71-K74; K76.0; K76.6 |
| **Peptic ulcer** | Ulcer of esophagus; Gastric, duodenal or gastrojejunal ulcer; Etc. | K22.1; K25-K28 |
| **MALIGNANT:** |  |  |
| **Any solid tumor** | Malignant neoplasm inlcuding brain cancer, lung cancer, breast cancer, melonoma; Etc. | C00-C75 |
| **Hematologic cancer** | Lymphoma; Malignant myeloma; Leukemia; Etc. | C81-C85; C88; C90-C96 |
| **Metastatic solid tumor** | Malignant neoplasm with mestastasis; Etc. | C76-C80 |
| **METABOLIC:** |  |  |
| **Diabetes, complicated** | Type I and II diabetes with kidney, ophthalmic, circulatory complication; Etc. | E10.2-E10.8; E11.2-E11.8 |
| **Diabetes, uncomplicated** | Type I and II diabetes without complications | E10.0, E10.1; E10.9, E11.0; E11.1; E11.9 |
| **Hypercholesterolemia** | Hypercholesterolemia; Etc. | E78.0 |
| **Thyroid disease** | Iodine-deficiency; Non-toxiz goiter; Thyrotoxicosis; Hypothyroidism; Etc. | E00-05; E06.2; E89.0 |
| **MUSCULOSKELETAL:** |  |  |
| **Rheumatic disease** | Sarcoidosis; Rheumatoid arthritis; Vasculitis; Systemic lupus erythematosus; Systemic sclerosis; Ankylosing spondylitis; Etc. | D86; L94.0; L94.1; L94.3; M05-M06; M08-M09; M12.0; M12.3; M30-M36; M45; M46.1; M46.8; M46.9 |
| **NEUROLOGICAL/PSYCHOLOGICAL:** |  |  |
| **Alcohol use disorder** | Mental and behavioural disorders due to use of alcohol; Niacin deficiency; Alcoholic cardiomyopathy; Alcoholic liver disease; Etc. | F10; E52; G62.1; I42.6; K29.2; K70.0; K70.3; K70.9; T51; Z50.2; Z71.4; Z72.1 |
| **Dementia** | Alzheimers dementia; Vascular dementia; Dementia in relation to neurological disorder; Etc. | F00-F03; F05.1; G30 |
| **Depression/anxiety** | Bipolar disorder; Depression; Phobias; Generalized anxeity; Etc. | F20.4; F31.3-F31.5; F32-F34.1; F40-F41; F41.2; F43.2; F45.2 |
| **Neurological disorder** | Huntington's disease; Parkinson's disease; Multiple sclerosis; Epilepsy; Encephalopathy; Etc. | G10-G13; G20-G22; G25.4; G25.5; G31.2; G31.8; G31.9; G32; G35-G37; G40-G41; G93.1; G93.4; R47.0; R56 |
| **PULMONARY:** |  |  |
| **Chronic pulmonary disease** | Bronchitis; Emphysema; Chronic obstructive pulmonary disease; Asthma; Pneumoconiosis; Interstitial lung disease; Etc. | J40-J47; J60-J67; J68.4; J70.1; J70.3; J84.1; J92.0; J96.1; J98.2; J98.3 |
| **Pulmonary circulation disorder** | Pulmonary embolism; Pulmonary hypertension; Etc. | I26; I27; I28.0; I28.8; I28.9 |
| **RENAL/HAEMATOLOGICAL:** |  |  |
| **Anemia** | Deficiency anemia; Blood loss anemia; Aplastic anemia; Etc. | D50-59, D60-64 |
| **Fluid and electrolyte disorders** | Volume depletion; Disorders of fluid, electrolyte and acid-base balance; Etc. | E22.2, E86-E87 |
| **Renal disease** | Hypertensive chronic kidney disease; Glumerular disease; Renal tubulo-interstitial diseases; Kidney failure; Etc. | I12-I13; N00-N05; N07; N11; N14; N17-N19; Q61 |

**Table A.2** Anatomical Therapeutic Chemical Classification System (ATC) codes used for defining community-treated infection in the study.

| **Type** | **ATC code** |
| --- | --- |
| Systemic antibacterials |  |
|  | J01 |
|  | J04 |
|  | A02BD |

**Table A.3** International Classification of Disease 10th Edition (ICD-10) codes used for defining hospital-treated infection in the study.

| **Infection Type** | **ICD10** | **Exclusion** |
| --- | --- | --- |
| Intra-abdominal infections | A00 |  |
| Intra-abdominal infections | A01 |  |
| Intra-abdominal infections | A02 |  |
| Sepsis | A021 |  |
| Infections of CNS | A022C |  |
| Intra-abdominal infections | A03 |  |
| Intra-abdominal infections | A04 |  |
| Intra-abdominal infections | A05 |  |
| Intra-abdominal infections | A06 |  |
| Intra-abdominal infections | A07 |  |
| Intra-abdominal infections | A08 |  |
| Intra-abdominal infections | A09 |  |
| Infections of CNS | A170 |  |
| Miscellaneous bacterial infections | A20 |  |
| Infections of CNS | A203 |  |
| Miscellaneous bacterial infections | A21 |  |
| Miscellaneous bacterial infections | A22 |  |
| Sepsis | A227 |  |
| Miscellaneous bacterial infections | A23 |  |
| Miscellaneous bacterial infections | A24 |  |
| Miscellaneous bacterial infections | A25 |  |
| Miscellaneous bacterial infections | A26 |  |
| Miscellaneous bacterial infections | A27 |  |
| Miscellaneous bacterial infections | A28 |  |
| Sepsis | A282B |  |
| Miscellaneous bacterial infections | A30 |  |
| Miscellaneous bacterial infections | A31 |  |
| Miscellaneous bacterial infections | A32 |  |
| Infections of CNS | A321 |  |
| Sepsis | A327 |  |
| Miscellaneous bacterial infections | A33 |  |
| Miscellaneous bacterial infections | A34 |  |
| Miscellaneous bacterial infections | A35 |  |
| Miscellaneous bacterial infections | A36 |  |
| Miscellaneous bacterial infections | A37 |  |
| Miscellaneous bacterial infections | A38 |  |
| Infections of CNS | A390 |  |
| Bacteremia | A394 |  |
| Sepsis | A40 |  |
| Sepsis | A41 |  |
| Miscellaneous bacterial infections | A42 |  |
| Sepsis | A427 |  |
| Miscellaneous bacterial infections | A43 |  |
| Miscellaneous bacterial infections | A44 |  |
| Skin infections | A46 |  |
| Miscellaneous bacterial infections | A48 |  |
| Miscellaneous bacterial infections | A49 |  |
| Bacteremia | A499A |  |
| Sexually transmitted diseases | A50 |  |
| Sexually transmitted diseases | A51 |  |
| Sexually transmitted diseases | A52 |  |
| Sexually transmitted diseases | A53 |  |
| Sexually transmitted diseases | A54 |  |
| Abscess | A541 | A541B |
| Infections of CNS | A548D |  |
| Sepsis | A548G |  |
| Sexually transmitted diseases | A55 |  |
| Sexually transmitted diseases | A56 |  |
| Sexually transmitted diseases | A57 |  |
| Sexually transmitted diseases | A58 |  |
| Sexually transmitted diseases | A59 |  |
| Sexually transmitted diseases | A60 |  |
| Sexually transmitted diseases | A63 |  |
| Sexually transmitted diseases | A64 |  |
| Miscellaneous bacterial infections | A65 |  |
| Miscellaneous bacterial infections | A66 |  |
| Miscellaneous bacterial infections | A67 |  |
| Miscellaneous bacterial infections | A68 |  |
| Miscellaneous bacterial infections | A69 |  |
| Miscellaneous bacterial infections | A70 |  |
| Miscellaneous bacterial infections | A71 |  |
| Miscellaneous bacterial infections | A74 |  |
| Miscellaneous bacterial infections | A75 |  |
| Miscellaneous bacterial infections | A77 |  |
| Miscellaneous bacterial infections | A78 |  |
| Miscellaneous bacterial infections | A79 |  |
| Infections of CNS | A80 |  |
| Infections of CNS | A81 |  |
| Infections of CNS | A82 |  |
| Infections of CNS | A83 |  |
| Infections of CNS | A84 |  |
| Infections of CNS | A85 |  |
| Infections of CNS | A86 |  |
| Infections of CNS | A87 |  |
| Infections of CNS | A88 |  |
| Infections of CNS | A89 |  |
| Miscellaneous viral infections | B00 |  |
| Miscellaneous viral infections | B01 |  |
| Miscellaneous viral infections | B02 |  |
| Miscellaneous viral infections | B03 |  |
| Miscellaneous viral infections | B04 |  |
| Miscellaneous viral infections | B05 |  |
| Miscellaneous viral infections | B06 |  |
| Miscellaneous viral infections | B07 |  |
| Miscellaneous viral infections | B08 |  |
| Miscellaneous viral infections | B09 |  |
| Viral hepatitis | B15 |  |
| Viral hepatitis | B16 |  |
| Viral hepatitis | B17 |  |
| Viral hepatitis | B18 |  |
| Viral hepatitis | B19 |  |
| Human immunodeficiency virus [HIV] disease | B20 |  |
| Human immunodeficiency virus [HIV] disease | B21 |  |
| Human immunodeficiency virus [HIV] disease | B22 |  |
| Human immunodeficiency virus [HIV] disease | B23 |  |
| Human immunodeficiency virus [HIV] disease | B24 |  |
| Miscellaneous viral infections | B25 |  |
| Miscellaneous viral infections | B26 |  |
| Miscellaneous viral infections | B27 |  |
| Miscellaneous viral infections | B30 |  |
| Miscellaneous viral infections | B33 |  |
| Miscellaneous viral infections | B34 |  |
| COVID-19 | B342A |  |
| Candidiasis and other fungal infections | B35 |  |
| Candidiasis and other fungal infections | B36 |  |
| Candidiasis and other fungal infections | B37 |  |
| Candidiasis and other fungal infections | B38 |  |
| Candidiasis and other fungal infections | B39 |  |
| Candidiasis and other fungal infections | B40 |  |
| Candidiasis and other fungal infections | B41 |  |
| Candidiasis and other fungal infections | B42 |  |
| Abscess | B43 | B430, B438, B439 |
| Candidiasis and other fungal infections | B43 |  |
| Candidiasis and other fungal infections | B44 |  |
| Candidiasis and other fungal infections | B45 |  |
| Candidiasis and other fungal infections | B46 |  |
| Candidiasis and other fungal infections | B47 |  |
| Candidiasis and other fungal infections | B48 |  |
| Candidiasis and other fungal infections | B49 |  |
| Parasitic infections | B50 |  |
| Parasitic infections | B51 |  |
| Parasitic infections | B52 |  |
| Parasitic infections | B53 |  |
| Parasitic infections | B54 |  |
| Parasitic infections | B55 |  |
| Parasitic infections | B56 |  |
| Parasitic infections | B57 |  |
| Parasitic infections | B58 |  |
| Parasitic infections | B60 |  |
| Parasitic infections | B64 |  |
| Parasitic infections | B65 |  |
| Parasitic infections | B66 |  |
| Parasitic infections | B67 |  |
| Parasitic infections | B68 |  |
| Parasitic infections | B69 |  |
| Parasitic infections | B70 |  |
| Parasitic infections | B71 |  |
| Parasitic infections | B72 |  |
| Parasitic infections | B73 |  |
| Parasitic infections | B74 |  |
| Parasitic infections | B75 |  |
| Parasitic infections | B76 |  |
| Parasitic infections | B77 |  |
| Parasitic infections | B78 |  |
| Parasitic infections | B79 |  |
| Parasitic infections | B80 |  |
| Parasitic infections | B81 |  |
| Parasitic infections | B82 |  |
| Parasitic infections | B83 |  |
| Parasitic infections | B85 |  |
| Parasitic infections | B86 |  |
| Parasitic infections | B87 |  |
| Parasitic infections | B88 |  |
| Parasitic infections | B89 |  |
| Other or sequelae | B90 |  |
| Other or sequelae | B91 |  |
| Other or sequelae | B92 |  |
| Other or sequelae | B94 | B948A |
| COVID-19 | B948A |  |
| Other or sequelae | B95 |  |
| Other or sequelae | B96 |  |
| Other or sequelae | B97 | B972A |
| COVID-19 | B972A |  |
| Other or sequelae | B98 |  |
| Other or sequelae | B99 |  |
| Abscess | D733 |  |
| Abscess | E060A |  |
| Abscess | E236A |  |
| Abscess | E321 |  |
| Infections of CNS | G00 |  |
| Infections of CNS | G01 |  |
| Infections of CNS | G02 |  |
| Infections of CNS | G03 |  |
| Infections of CNS | G04 |  |
| Infections of CNS | G05 |  |
| Infections of CNS | G06 |  |
| Infections of CNS | G07 |  |
| Other or sequelae | H00 | H000A, H010 |
| Abscess | H000A |  |
| Skin infections | H010 |  |
| Skin infections | H03 | H030, H031 |
| Other or sequelae | H030 |  |
| Other or sequelae | H031 |  |
| Other or sequelae | H043 |  |
| Other or sequelae | H050 | H050A |
| Abscess | H050A |  |
| Other or sequelae | H061 |  |
| Other or sequelae | H10 |  |
| Other or sequelae | H130 |  |
| Other or sequelae | H131 |  |
| Other or sequelae | H150 |  |
| Other or sequelae | H191 |  |
| Other or sequelae | H192 |  |
| Other or sequelae | H220 |  |
| Other or sequelae | H320 |  |
| Other or sequelae | H440 | H440A |
| Abscess | H440A |  |
| Other or sequelae | H441 |  |
| Abscess | H600 |  |
| Abscess | H600A |  |
| Skin infections | H601 |  |
| Skin infections | H603 |  |
| Other or sequelae | H609 |  |
| Other or sequelae | H610 |  |
| Other or sequelae | H620 |  |
| Other or sequelae | H621 |  |
| Other or sequelae | H622 |  |
| Other or sequelae | H623 |  |
| Other or sequelae | H650 |  |
| Other or sequelae | H660 |  |
| Other or sequelae | H661 |  |
| Other or sequelae | H662 |  |
| Other or sequelae | H663 |  |
| Other or sequelae | H664 |  |
| Other or sequelae | H669 |  |
| Other or sequelae | H67 |  |
| Other or sequelae | H680 |  |
| Other or sequelae | H700 |  |
| Other or sequelae | H830 |  |
| Other or sequelae | H940 |  |
| Heart infections (acute rheumatic fever, infectious peri- or myocarditis, endocarditis) | I00 |  |
| Heart infections (acute rheumatic fever, infectious peri- or myocarditis, endocarditis) | I01 |  |
| Heart infections (acute rheumatic fever, infectious peri- or myocarditis, endocarditis) | I02 |  |
| Heart infections (acute rheumatic fever, infectious peri- or myocarditis, endocarditis) | I301 |  |
| Heart infections (acute rheumatic fever, infectious peri- or myocarditis, endocarditis) | I320 |  |
| Heart infections (acute rheumatic fever, infectious peri- or myocarditis, endocarditis) | I33 |  |
| Heart infections (acute rheumatic fever, infectious peri- or myocarditis, endocarditis) | I38 |  |
| Heart infections (acute rheumatic fever, infectious peri- or myocarditis, endocarditis) | I398 |  |
| Heart infections (acute rheumatic fever, infectious peri- or myocarditis, endocarditis) | I400 |  |
| Upper respiratory tract infection | J00 |  |
| Upper respiratory tract infection | J01 |  |
| Upper respiratory tract infection | J02 |  |
| Upper respiratory tract infection | J03 |  |
| Upper respiratory tract infection | J04 |  |
| Upper respiratory tract infection | J05 |  |
| Upper respiratory tract infection | J06 |  |
| Influenza | J10 |  |
| Influenza | J11 |  |
| Pneumonia | J12 |  |
| Pneumonia | J13 |  |
| Pneumonia | J14 |  |
| Pneumonia | J15 |  |
| Pneumonia | J16 |  |
| Pneumonia | J17 |  |
| Pneumonia | J18 |  |
| Other lower-respiratory tract infections | J20 |  |
| Other lower-respiratory tract infections | J21 |  |
| Other lower-respiratory tract infections | J22 |  |
| Abscess | J340 | J340E, J340F, J340G, J340H |
| Other lower-respiratory tract infections | J340 | J340E, J340F, J340G, J340H |
| Abscess | J340A |  |
| Other lower-respiratory tract infections | J350 |  |
| Abscess | J36 |  |
| Upper respiratory tract infection | J36 |  |
| Other lower-respiratory tract infections | J383C |  |
| Abscess | J383D |  |
| Other lower-respiratory tract infections | J383D |  |
| Other lower-respiratory tract infections | J387B |  |
| Other lower-respiratory tract infections | J387F |  |
| Abscess | J387G |  |
| Other lower-respiratory tract infections | J387G |  |
| Abscess | J390 |  |
| Upper respiratory tract infection | J390 |  |
| Abscess | J391 |  |
| Upper respiratory tract infection | J391 |  |
| Abscess | J398A |  |
| Other lower-respiratory tract infections | J440 |  |
| Abscess | J851 |  |
| Other lower-respiratory tract infections | J851 |  |
| Abscess | J852 |  |
| Abscess | J853 |  |
| Other lower-respiratory tract infections | J86 |  |
| Other or sequelae | K040 |  |
| Abscess | K046 |  |
| Abscess | K047 |  |
| Other or sequelae | K052 |  |
| Abscess | K113 |  |
| Abscess | K122 |  |
| Skin infections | K122 |  |
| Abscess | K130A |  |
| Skin infections | K130A |  |
| Abscess | K140A |  |
| Abscess | K209A |  |
| Intra-abdominal infections | K35 |  |
| Abscess | K353A |  |
| Abscess | K353B |  |
| Intra-abdominal infections | K37 |  |
| Abscess | K570 | K570B, K570C |
| Intra-abdominal infections | K570 |  |
| Abscess | K572 | K572B, K572C |
| Intra-abdominal infections | K572 |  |
| Abscess | K574 | K574A |
| Intra-abdominal infections | K574 |  |
| Abscess | K578 |  |
| Intra-abdominal infections | K578 |  |
| Abscess | K61 |  |
| Intra-abdominal infections | K61 |  |
| Skin infections | K61 |  |
| Abscess | K630 |  |
| Intra-abdominal infections | K630 |  |
| Intra-abdominal infections | K650 | K650M, K650N, K650O, K650P |
| Intra-abdominal infections | K659 |  |
| Intra-abdominal infections | K67 |  |
| Abscess | K750 |  |
| Intra-abdominal infections | K750 |  |
| Intra-abdominal infections | K751 |  |
| Intra-abdominal infections | K800 |  |
| Intra-abdominal infections | K803 |  |
| Intra-abdominal infections | K804 |  |
| Intra-abdominal infections | K810 |  |
| Abscess | K810A |  |
| Intra-abdominal infections | K819 |  |
| Intra-abdominal infections | K830 |  |
| Abscess | K858A |  |
| Intra-abdominal infections | K858A |  |
| Intra-abdominal infections | K859 |  |
| Skin infections | L00 |  |
| Skin infections | L01 |  |
| Abscess | L02 |  |
| Skin infections | L02 |  |
| Skin infections | L03 |  |
| Other or sequelae | L04 |  |
| Other or sequelae | L05 | L050 |
| Abscess | L050 |  |
| Skin infections | L08 |  |
| Skin infections | L303 |  |
| Skin infections | L738 |  |
| Spectic arthritis, osteomyelitis, myositis | M00 |  |
| Spectic arthritis, osteomyelitis, myositis | M01 |  |
| Abscess | M608A |  |
| Abscess | M608A1 |  |
| Spectic arthritis, osteomyelitis, myositis | M630 |  |
| Spectic arthritis, osteomyelitis, myositis | M631 |  |
| Spectic arthritis, osteomyelitis, myositis | M632 |  |
| Skin infections | M726 |  |
| Spectic arthritis, osteomyelitis, myositis | M86 |  |
| Abscess | M868A |  |
| Abscess | M869A |  |
| Urinary tract infections | N080 |  |
| Urinary tract infections | N10 |  |
| Urinary tract infections | N11 |  |
| Urinary tract infections | N12 |  |
| Urinary tract infections | N136 |  |
| Abscess | N151 |  |
| Urinary tract infections | N151 |  |
| Urinary tract infections | N159 |  |
| Urinary tract infections | N160 |  |
| Urinary tract infections | N288D |  |
| Urinary tract infections | N288E |  |
| Urinary tract infections | N288F |  |
| Urinary tract infections | N290 |  |
| Urinary tract infections | N291 |  |
| Urinary tract infections | N30 |  |
| Urinary tract infections | N330 |  |
| Abscess | N340 |  |
| Urinary tract infections | N340 |  |
| Urinary tract infections | N341 |  |
| Urinary tract infections | N390 |  |
| Male genital infections | N41 |  |
| Abscess | N412 |  |
| Male genital infections | N45 |  |
| Abscess | N450 |  |
| Other or sequelae | N481 |  |
| Other or sequelae | N482 |  |
| Other or sequelae | N49 | N492A |
| Abscess | N492A |  |
| Other or sequelae | N510 |  |
| Other or sequelae | N511 |  |
| Other or sequelae | N512 |  |
| Abscess | N619A |  |
| Abscess | N619B |  |
| Other or sequelae | N619E |  |
| Female pelvic infections | N70 |  |
| Abscess | N700A |  |
| Abscess | N700B |  |
| Female pelvic infections | N71 |  |
| Abscess | N710A |  |
| Female pelvic infections | N72 |  |
| Female pelvic infections | N73 |  |
| Abscess | N730A |  |
| Abscess | N730B |  |
| Abscess | N732A |  |
| Abscess | N732B |  |
| Abscess | N733A |  |
| Abscess | N735A |  |
| Abscess | N738A |  |
| Abscess | N738C |  |
| Female pelvic infections | N74 |  |
| Female pelvic infections | N75 |  |
| Abscess | N751 |  |
| Female pelvic infections | N76 |  |
| Abscess | N764 |  |
| Abscess | N768A |  |
| Female pelvic infections | N77 |  |
| Obstetrical infections | O23 |  |
| Obstetrical infections | O264 |  |
| Obstetrical infections | O411 |  |
| Obstetrical infections | O740 |  |
| Obstetrical infections | O753 |  |
| Obstetrical infections | O85 |  |
| Obstetrical infections | O86 |  |
| Obstetrical infections | O883 |  |
| Obstetrical infections | O91 |  |
| Obstetrical infections | O98 |  |
| Infectious complications of procedures, catheters etc. | T802 |  |
| Infectious complications of procedures, catheters etc. | T814 |  |
| Infectious complications of procedures, catheters etc. | T826 |  |
| Infectious complications of procedures, catheters etc. | T827 |  |
| Infectious complications of procedures, catheters etc. | T835 |  |
| Infectious complications of procedures, catheters etc. | T836 |  |
| Infectious complications of procedures, catheters etc. | T845 |  |
| Infectious complications of procedures, catheters etc. | T846 |  |
| Infectious complications of procedures, catheters etc. | T847 |  |
| Infectious complications of procedures, catheters etc. | T857 |  |
| Infectious complications of procedures, catheters etc. | T880 |  |
| Infectious complications of procedures, catheters etc. | T880A |  |
| Infectious complications of procedures, catheters etc. | T89 |  |
| Infectious complications of procedures, catheters etc. | T899 |  |
| COVID-19 | Z861A |  |
